# Supplementary material for: Identification of a chaperone-code responsible for Rad51-mediated genome repair
Source: PubMed Central journal article supplement (PMC11154708; doi:10.1016/j.jbc.2024.107342), 2024-05-03
Supplement: mmc1.pdf [file mmc1.pdf]

**A**

|                            |     |                                                                                 |     |
|----------------------------|-----|---------------------------------------------------------------------------------|-----|
| <i>H. sapiens</i> Hsp90α   | 18- | ETFAFQAEIAQLMSLIINTFY <b><u>SN</u></b> <b><u>K</u></b> EIFLRELIS                | -50 |
| <i>G. gallus</i> Hsp90β    | 13- | ETFAFQAEIAQLMSLIINTFY <b><u>SN</u></b> <b><u>K</u></b> EIFLRELIS                | -45 |
| <i>S. cerevisiae</i> Hsp82 | 4-  | ETFEFQAEITQLMSLIINTV <b><u>YS</u></b> <b><u>N</u></b> <b><u>K</u></b> EIFLRELIS | -36 |
| <i>S. cerevisiae</i> Hsc82 | 4-  | ETFEFQAEITQLMSLIINTV <b><u>YS</u></b> <b><u>N</u></b> <b><u>K</u></b> EIFLRELIS | -36 |
| <i>G. gallus</i> Hsp90α    | 17- | ETFAFQAEIAQLMSLIINTFY <b><u>SN</u></b> <b><u>K</u></b> EIFLRELIS                | -49 |
| <i>H. sapiens</i> Hsp90β   | 13- | ETFAFQAEIAQLMSLIINTFY <b><u>SN</u></b> <b><u>K</u></b> EIFLRELIS                | -45 |
| <i>M. musculus</i> Hsp90β  | 13- | ETFAFQAEIAQLMSLIINTFY <b><u>SN</u></b> <b><u>K</u></b> EIFLRELIS                | -45 |
| <i>M. musculus</i> Hsp90α  | 18- | ETFAFQAEIAQLMSLIINTFY <b><u>SN</u></b> <b><u>K</u></b> EIFLRELIS                | -50 |

**B**

|                            |      |                                                                   |      |
|----------------------------|------|-------------------------------------------------------------------|------|
| <i>H. sapiens</i> Hsp90α   | 292- | KT <b><u>K</u></b> PIWTRNPDDITNEEYGEFYKSLTNDWEDHL                 | -324 |
| <i>G. gallus</i> Hsp90β    | 288- | KT <b><u>K</u></b> PIWTRNPDDITQEEYGEFYKSLTNDWEDHL                 | -321 |
| <i>S. cerevisiae</i> Hsp82 | 272- | KT <b><u>K</u></b> PLWTRNPSDITQEEYNAFYK <b><u>S</u></b> ISNDWEDPL | -304 |
| <i>S. cerevisiae</i> Hsc82 | 268- | KT <b><u>K</u></b> PLWTRNPSDITQEEYNAFYK <b><u>S</u></b> ISNDWEDPL | -300 |
| <i>G. gallus</i> Hsp90α    | 288- | KT <b><u>K</u></b> PIWTRNPDDITNEEYGEFYKSLTNDWEDHL                 | -320 |
| <i>H. sapiens</i> Hsp90β   | 284- | KT <b><u>K</u></b> PIWTRNPDDITQEEYGEFYKSLTNDWEDHL                 | -316 |
| <i>M. musculus</i> Hsp90β  | 284- | KT <b><u>K</u></b> PIWTRNPDDITQEEYGEFYKSLTNDWEDHL                 | -316 |
| <i>M. musculus</i> Hsp90α  | 293- | KT <b><u>K</u></b> PIWTRNPDDITNEEYGEFYKSLTNDWEEHL                 | -325 |

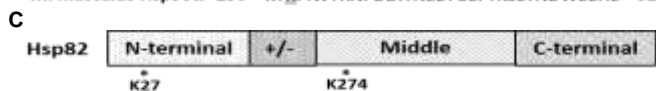

**Supporting information Figure S1:** (A) & (B) Multiple sequence alignment of Hsp90 isoforms (alpha and beta) from *Homo sapiens*, *Gallus gallus* *Saccharomyces cerevisiae* and *Mus musculus* showed that both the K27 and K274 residues (shown in bold and underlined) are conserved across the eukaryotes. (C) Schematic representation of Hsp82 domain structure illustrates the position of K27 in the N-terminal domain and K274 in the middle domain; (+/-) denotes the charged-linker region.
